# Supplementary material for: Gene Expression and Co-expression Networks Are Strongly Altered Through Stages in Clear Cell Renal Carcinoma
Source: Front Genet. 2020 Nov 3;11:578679. doi: 10.3389/fgene.2020.578679 (PMC7669746; doi:10.3389/fgene.2020.578679)
Supplement: Supplementary Material 1 — Quality control for gene expression in the five phenotypes. This zip file contains five folders with the quality control pre and post normalization of gene expression data. They include length bias correction, GC-content correction, and PCA for the five groups. [file Data_Sheet_1.ZIP]

Archive with 19 entries (17 files):
- QC_POST/
- QC_POST/01-Lengthbias.png
- QC_POST/02-GCbias.png
- QC_POST/03-PCAVariance_raw.pdf
- QC_POST/04-PCALoading_raw.pdf
- QC_POST/05-PCAScore_raw.pdf
- QC_PRE/
- QC_PRE/05-Lengthbias.png
- QC_PRE/01-biodetection.Rd_00001.png
- QC_PRE/01-biodetection.Rd_00002.png
- QC_PRE/02-countsbio.png
- QC_PRE/02-protein_coding_boxplot.png
- QC_PRE/02-protein_coding_barplot.png
- QC_PRE/03-protein_coding_boxplot_group.png
- QC_PRE/04-protein_coding_barplot_group.png
- QC_PRE/06-GCbias.png
- QC_PRE/08-PCAVariance_raw.pdf
- QC_PRE/09-PCALoading_raw.pdf
- QC_PRE/10-PCAScore_raw.pdf
